# Supplementary material
Source: PubMed Central journal article supplement (PMC3904678)
Supplement: NIHMS539923-supplement-01.pdf [file NIHMS539923-supplement-01.pdf]

# THE LANCET **Neurology**

## **Supplementary webappendix**

This webappendix formed part of the original submission and has been peer reviewed. We post it as supplied by the authors.

Supplement to: Vos SJB, Xiong C, Visser PJ, et al. Preclinical Alzheimer's disease and its outcome: a longitudinal cohort study. *Lancet Neurol* 2013; published online Sept 4. [http://dx.doi.org/10.1016/S1474-4422\(13\)70194-7](http://dx.doi.org/10.1016/S1474-4422(13)70194-7).

## **Preclinical Alzheimer's disease and its outcome: a longitudinal cohort study**

Stephanie J.B. Vos MSc, Chengjie Xiong PhD, Pieter Jelle Visser MD, Mateusz S. Jasielec MS, Jason Hassenstab PhD, Elizabeth A. Grant PhD, Nigel J. Cairns PhD, John C. Morris MD, David M. Holtzman MD, Anne M. Fagan PhD

Supplemental Table 1. Baseline demographics of the independent CDR 0·5 symptomatic AD sample

Supplemental Table 2. Overview of concepts for mild cognitive impairments

Supplemental Table 3. Exact p-values for the pairwise comparisons of Table 1

Supplemental Table 4. Distribution of preclinical AD stages

Supplemental Table 5. Preclinical AD and its outcome according to age and *APOE* genotype

Supplemental Figure 1. Annual rate of change in CDR-SB and MMSE by preclinical AD stage

Supplemental Figure 2. Individual cognitive trajectories for CDR-SB and MMSE by preclinical AD stage

Supplemental Text 1. Cohort information

Supplemental Table 6. Preclinical AD and its outcome using different classification approaches

Supplemental Table 7. Prediction of the unclassified group for CDR $\geq$ 0·5 symptomatic AD, mortality, and annual cognitive decline

**Supplemental Table 1. Baseline demographics of the independent CDR 0·5 symptomatic AD sample (N=74)**

|                                      |            |
|--------------------------------------|------------|
| Age                                  | 74·5 (5·4) |
| Female, n                            | 36 (49%)   |
| Education, y                         | 14·5 (3·1) |
| Ethnic origin, n                     |            |
| White                                | 71 (96%)   |
| African-American                     | 2 (3%)     |
| Native Hawaiian and Pacific Islander | 1 (1%)     |
| <i>APOE</i> - $\epsilon$ 4+, n       | 51 (69%)   |
| MMSE                                 | 25·9 (3·0) |
| CDR-SB                               | 2·5 (1·0)  |
| Episodic memory, z-score             | -1·6 (1·0) |
| A $\beta$ 1-42, pg/mL                | 424 (219)  |
| T-tau, pg/mL                         | 607 (293)  |
| P-tau181, pg/mL                      | 97 (48)    |

Results are mean (SD) or number (%). Episodic memory is a composite score of the Associate Learning Test, Logical Memory Test, and Selective Reminding Test. AD=Alzheimer's disease, *APOE*=Apolipoprotein E, MMSE=Mini-Mental State Examination (range 0-30, with 30 as the best score), CDR-SB=Clinical Dementia Rating scale Sum of Boxes (range 0-16, with 0 as the best score), A $\beta$ =beta amyloid, p-tau=phosphorylated tau, t-tau=total tau.

**Supplementary Table 2. Overview of concepts for mild cognitive impairments**

| Construct                           | Definition                    | Functional impairment                                                                    | Clinical dementia diagnosis according to DSM IV or ICD-10 | Biomarker status |
|-------------------------------------|-------------------------------|------------------------------------------------------------------------------------------|-----------------------------------------------------------|------------------|
| CDR 0-5 symptomatic AD <sup>1</sup> | Defined cut-offs not utilized | Very mild to mild change in daily functioning in memory and at least 1 non-memory domain | Some                                                      | Not needed       |
| Amnesic MCI <sup>2</sup>            | Yes, in memory domain         | Subjective report of cognitive decline                                                   | No                                                        | Not needed       |
| MCI due to AD <sup>3</sup>          | Yes, in any cognitive domain  | Cognitive concern reflecting a change in cognition                                       | No                                                        | Abnormal         |
| Prodromal AD <sup>4</sup>           | Yes, in memory domain         | Complaints of memory decline                                                             | No                                                        | Abnormal         |

## References

1. Morris JC. The Clinical Dementia Rating (CDR): current version and scoring rules. *Neurology* 1993; **43**: 2412–14.
2. Petersen RC. Mild cognitive impairment as a diagnostic entity. *Journal of Internal Medicine* 2004; **256**: 183–94.
3. Albert MS, DeKosky ST, Dickson D, Dubois B, Feldman HH, Fox NC, et al. The diagnosis of mild cognitive impairment due to Alzheimer's disease: Recommendations from the National Institute on Aging and Alzheimer's Association workgroup. *Alzheimers Dement* 2011; **7**: 270–9.
4. Dubois B, Feldman HH, Jacova C, Dekosky ST, Barberger-Gateau P, Cummings J, et al. Research criteria for the diagnosis of Alzheimer's disease: revising the NINCDS-ADRDA criteria. *Lancet Neurol* 2007; **6**: 734–46.

Supplemental Table 3. Exact p-values for the pairwise comparisons of Table 1.

|                               | Normal vs. stage 1 | Normal vs. stage 2 | Normal vs. stage 3 | Normal vs. SNAP | Normal vs. unclassified | Stage 1 vs. stage 2 | Stage 1 vs. stage 3 | Stage 1 vs. SNAP | Stage 1 vs. unclassified | Stage 2 vs. stage 3 | Stage 2 vs. SNAP | Stage 2 vs. unclassified | Stage 3 vs. SNAP | Stage 3 vs. unclassified | SNAP vs. unclassified |
|-------------------------------|--------------------|--------------------|--------------------|-----------------|-------------------------|---------------------|---------------------|------------------|--------------------------|---------------------|------------------|--------------------------|------------------|--------------------------|-----------------------|
| Age                           | 0-0007             | 0-0003             | <0-0001            | 0-0003          | <0-0001                 | 0-6531              | 0-0146              | 0-8184           | 0-0084                   | 0-0393              | 0-4849           | 0-0254                   | 0-0074           | 0-9222                   | 0-0039                |
| Female                        | 0-3678             | 0-4333             | 0-0859             | 0-6665          | 0-1451                  | 0-1763              | 0-2501              | 0-2482           | 0-3864                   | 0-0465              | 0-6756           | 0-0778                   | 0-0627           | 0-7855                   | 0-1060                |
| Education                     | 0-0004             | 0-7729             | 0-2942             | 0-7115          | 0-3502                  | 0-0127              | 0-0037              | 0-0033           | 0-0044                   | 0-2665              | 1-000            | 0-3138                   | 0-2329           | 0-9123                   | 0-2775                |
| <i>APOE</i> - $\epsilon$ 4    | 0-0059             | 0-0045             | 0-0025             | 0-3787          | 0-7804                  | 0-7731              | 0-1601              | 0-0744           | 0-1008                   | 0-2380              | 0-0507           | 0-0758                   | 0-0125           | 0-0173                   | 0-4943                |
| MMSE                          | 0-0101             | 0-2195             | <0-0001            | 0-5203          | 0-0101                  | 0-3397              | 0-0024              | 0-0646           | 0-3532                   | 0-0003              | 0-5019           | 0-1159                   | <0-0001          | 0-0791                   | 0-0308                |
| CDR-SB                        | 0-3347             | 0-8380             | 0-1167             | 0-8884          | 0-7059                  | 0-5697              | 0-3502              | 0-3239           | 0-8482                   | 0-1961              | 0-7719           | 0-8300                   | 0-1134           | 0-3621                   | 0-6642                |
| Episodic memory               | 0-8437             | 0-2302             | <0-0001            | 0-6128          | <0-0001                 | 0-2409              | <0-0001             | 0-5646           | <0-0001                  | <0-0001             | 0-4567           | <0-0001                  | <0-0001          | 0-0671                   | <0-0001               |
| A $\beta$ 1-42                | <0-0001            | <0-0001            | <0-0001            | 0-0396          | 0-1847                  | 0-8954              | 0-5672              | <0-0001          | <0-0001                  | 0-6425              | <0-0001          | <0-0001                  | <0-0001          | <0-0001                  | 0-0209                |
| T-tau                         | 0-5470             | <0-0001            | <0-0001            | <0-0001         | 0-5634                  | <0-0001             | <0-0001             | <0-0001          | 0-8438                   | 0-3126              | 0-0004           | <0-0001                  | 0-0005           | <0-0001                  | <0-0001               |
| P-tau181                      | 0-9111             | <0-0001            | <0-0001            | <0-0001         | 0-1929                  | <0-0001             | <0-0001             | <0-0001          | 0-2537                   | 0-7014              | 0-0638           | <0-0001                  | 0-0955           | <0-0001                  | <0-0001               |
| Follow-up                     | 0-6396             | 0-7969             | 0-1251             | 0-9818          | 0-8928                  | 0-5625              | 0-0934              | 0-6575           | 0-8906                   | 0-2185              | 0-8249           | 0-7838                   | 0-1415           | 0-2084                   | 0-8876                |
| Progression to CDR $\geq$ 0.5 | 0-0077             | 0-0002             | <0-0001            | 0-1338          | 0-0005                  | 0-1575              | 0-0033              | 0-1770           | 0-1716                   | 0-0641              | 0-0069           | 0-7962                   | 0-0001           | 0-1875                   | 0-0145                |
| Mortality                     | 0-0180             | 0-0604             | 0-0003             | 0-0673          | 0-2077                  | 0-7250              | 0-0850              | 0-4808           | 0-7018                   | 0-0623              | 0-7953           | 0-8893                   | 0-0187           | 0-1436                   | 0-9787                |

Results are p-values of pairwise comparisons of Table 1. A $\beta$ = amyloid-beta, *APOE*=Apolipoprotein E, CDR-SB=Clinical Dementia Rating scale Sum of Boxes, MMSE=Mini-Mental State Examination, p-tau=phosphorylated tau, SNAP=Suspected Non-Alzheimer Pathophysiology, t-tau= total tau.

**Supplemental Table 4. Distribution of preclinical AD stages**

| Stage        | CSF A $\beta$ 1-42<br><459 pg/mL | CSF t-tau<br>>339 pg/mL | CSF p-tau181<br>>67 pg/mL | Cognition<br><-1.25 SD | N (%)      | Overall N (%) |
|--------------|----------------------------------|-------------------------|---------------------------|------------------------|------------|---------------|
| Normal group | -                                | -                       | -                         | -                      | 129 (41.5) | 129 (41.5)    |
| Stage 1      | +                                | -                       | -                         | -                      | 47 (15)    | 47 (15)       |
| Stage 2      | +                                | +                       | -                         | -                      | 8 (3)      | 36 (12)       |
|              | +                                | -                       | +                         | -                      | 5 (2)      |               |
|              | +                                | +                       | +                         | -                      | 23 (7)     |               |
| Stage 3      | +                                | +                       | -                         | +                      | 1 (0.5)    | 13 (4)        |
|              | +                                | +                       | +                         | +                      | 12 (3.5)   |               |
| SNAP group   | -                                | +                       | -                         | -                      | 14 (4.5)   | 72 (23)       |
|              | -                                | +                       | -                         | +                      | 2 (0.5)    |               |
|              | -                                | -                       | +                         | -                      | 9 (3)      |               |
|              | -                                | +                       | +                         | -                      | 45 (14.5)  |               |
|              | -                                | +                       | +                         | +                      | 2 (0.5)    |               |
| Unclassified | -                                | -                       | -                         | +                      | 11 (3.5)   | 14 (4.5)      |
|              | +                                | -                       | -                         | +                      | 3 (1)      |               |

Results are number (%) of participants identified in the different stages based on CSF markers with optimal Youden cut-offs: Abnormal CSF A $\beta$ 1-42 <459 pg/mL, t-tau >339 pg/mL, p-tau181 >67 pg/mL. Cognition was an episodic memory composite score of the Associate Learning Test, Logical Memory Test, and Selective Reminding Test, with a cut-off at the lowest 10<sup>th</sup> percentile: -1.25 SD. A $\beta$ =beta amyloid, AD=Alzheimer's disease, p-tau=phosphorylated tau, SNAP=Suspected Non-Alzheimer Pathophysiology, t-tau=total tau.

**Supplemental Table 5. Preclinical AD and its outcome according to age and *APOE* genotype**

| A                 | Baseline prevalence                    |                                        | Progression to CDR $\geq$ 0.5 symptomatic AD |                                       |
|-------------------|----------------------------------------|----------------------------------------|----------------------------------------------|---------------------------------------|
|                   | Age $\leq$ 72<br>(n=169)               | Age >72<br>(n=142)                     | Age $\leq$ 72<br>(n=6)                       | Age >72<br>(n=25)                     |
| No preclinical AD | 125 (74%)                              | 90 (64.5%)*                            | 1 (1%)                                       | 9 (10%)                               |
| Normal group      | 90 (53.5%)                             | 39 (27.5%)                             | 0 (0%)                                       | 2 (5%)                                |
| SNAP group        | 31 (18.5%)                             | 41 (29%)                               | 1 (3%)                                       | 3 (7%)                                |
| Unclassified      | 4 (2%)                                 | 10 (7%)                                | 0 (0%)                                       | 4 (40%)                               |
| Preclinical AD    | 44 (26%)                               | 52 (36.5%)                             | 5 (11%)                                      | 17 (33%)                              |
| Stage 1           | 25 (15%)                               | 22 (15.5%)                             | 1 (4%)                                       | 5 (23%)                               |
| Stage 2           | 17 (10%)                               | 19 (13%)                               | 2 (12%)                                      | 7 (37%)                               |
| Stage 3           | 2 (1%)                                 | 11 (8%)                                | 2 (100%)                                     | 5 (45.5%)                             |
| B                 | Baseline prevalence                    |                                        | Progression to CDR $\geq$ 0.5 symptomatic AD |                                       |
|                   | <i>APOE</i> - $\epsilon$ 4-<br>(n=205) | <i>APOE</i> - $\epsilon$ 4+<br>(n=106) | <i>APOE</i> - $\epsilon$ 4-<br>(n=18)        | <i>APOE</i> - $\epsilon$ 4+<br>(n=13) |
| No preclinical AD | 158 (77%)                              | 57 (53%)*                              | 7 (4%)                                       | 3 (5%)                                |
| Normal group      | 97 (47%)                               | 32 (30%)                               | 2 (2%)                                       | 0 (0%)                                |
| SNAP group        | 50 (24.5%)                             | 22 (21%)                               | 2 (4%)                                       | 2 (9%)                                |
| Unclassified      | 11 (5.5%)                              | 3 (2%)                                 | 3 (27%)                                      | 1 (33%)                               |
| Preclinical AD    | 47 (23%)                               | 49 (47%)                               | 11 (23%)                                     | 11 (22%)                              |
| Stage 1           | 25 (12%)                               | 22 (21%)                               | 2 (8%)                                       | 4 (18%)                               |
| Stage 2           | 18 (9%)                                | 18 (17%)                               | 6 (33%)                                      | 3 (17%)                               |
| Stage 3           | 4 (2%)                                 | 9 (9%)                                 | 3 (75%)                                      | 4 (44%)                               |

Data are baseline number (%) of participants with and without preclinical AD, and number (%) of these participants that progressed to CDR $\geq$ 0.5 symptomatic AD by dichotomous age (A) and *APOE* genotype (B) grouping. AD=Alzheimer's disease, *APOE*=Apolipoprotein E, CDR=Clinical Dementia Rating scale, SNAP=Suspected Non-Alzheimer Pathophysiology. \*P<0.05 compared to age  $\leq$ 72, \*\*\*p<0.001 compared to *APOE*- $\epsilon$ 4-, based on Chi-squared tests for 2 by 2 tables.

**Supplemental Figure 1. Annual rate of change in CDR-SB and MMSE by preclinical AD stage**

Figure legend:

Graphs show the estimated annual rate of change in CDR-SB (A) and MMSE (B), based on slopes according to each preclinical AD stage, corrected for age, gender, education, and *APOE* genotype. The black line represents participants in the normal group; light blue, stage 1; dark blue, stage 2; red, stage 3; and grey, SNAP. CDR-SB=Clinical Dementia Rating scale Sum of Boxes (range 0-18, with 0 as the best score), MMSE=Mini-Mental State Examination (range 0-30, with 30 as the best score).

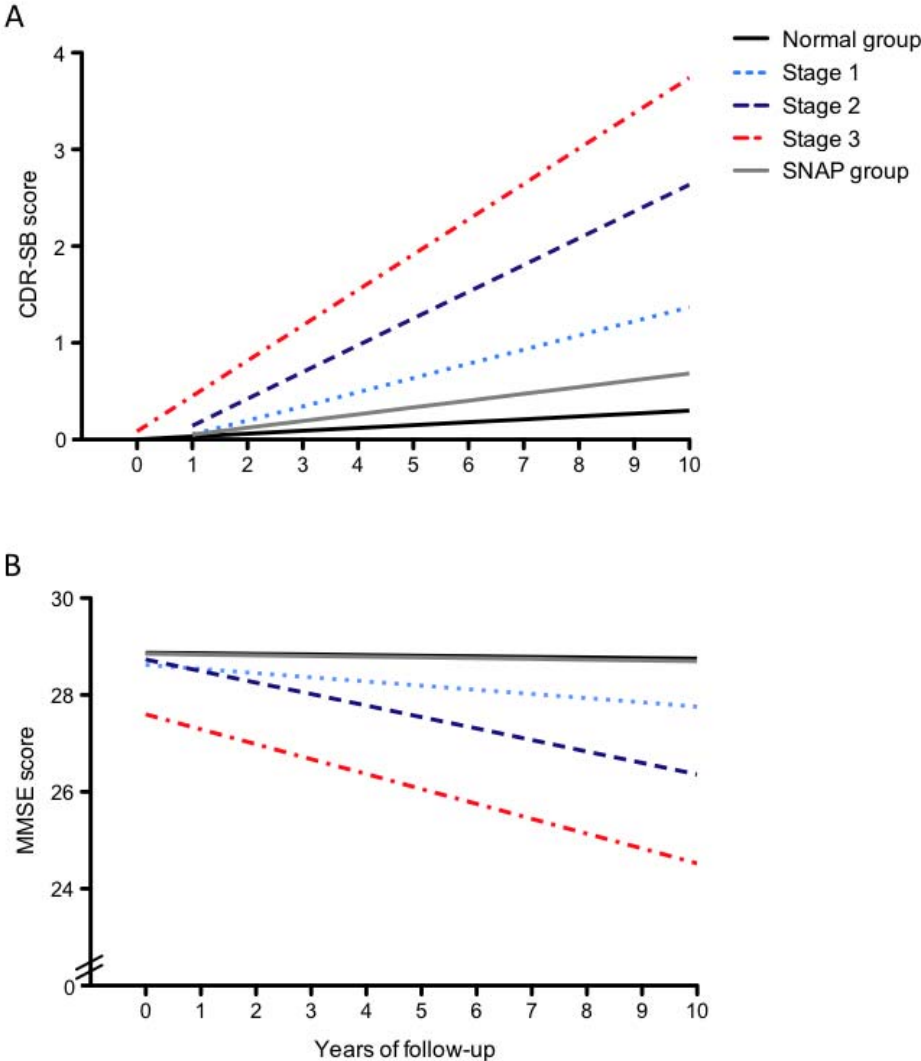



## Supplemental Figure 2. Individual cognitive trajectories for CDR-SB and MMSE by preclinical AD stage

Figure legend:

Graphs show individual cognitive trajectories (blue) and the overall estimated annual rate of change (red) for CDR-SB (A) and MMSE (B) by preclinical AD stage. CDR-SB=Clinical Dementia Rating scale Sum of Boxes (range 0-18, with 0 as the best score), MMSE=Mini-Mental State Examination (range 0-30, with 30 as the best score), SNAP= Suspected Non-Alzheimer Pathophysiology.

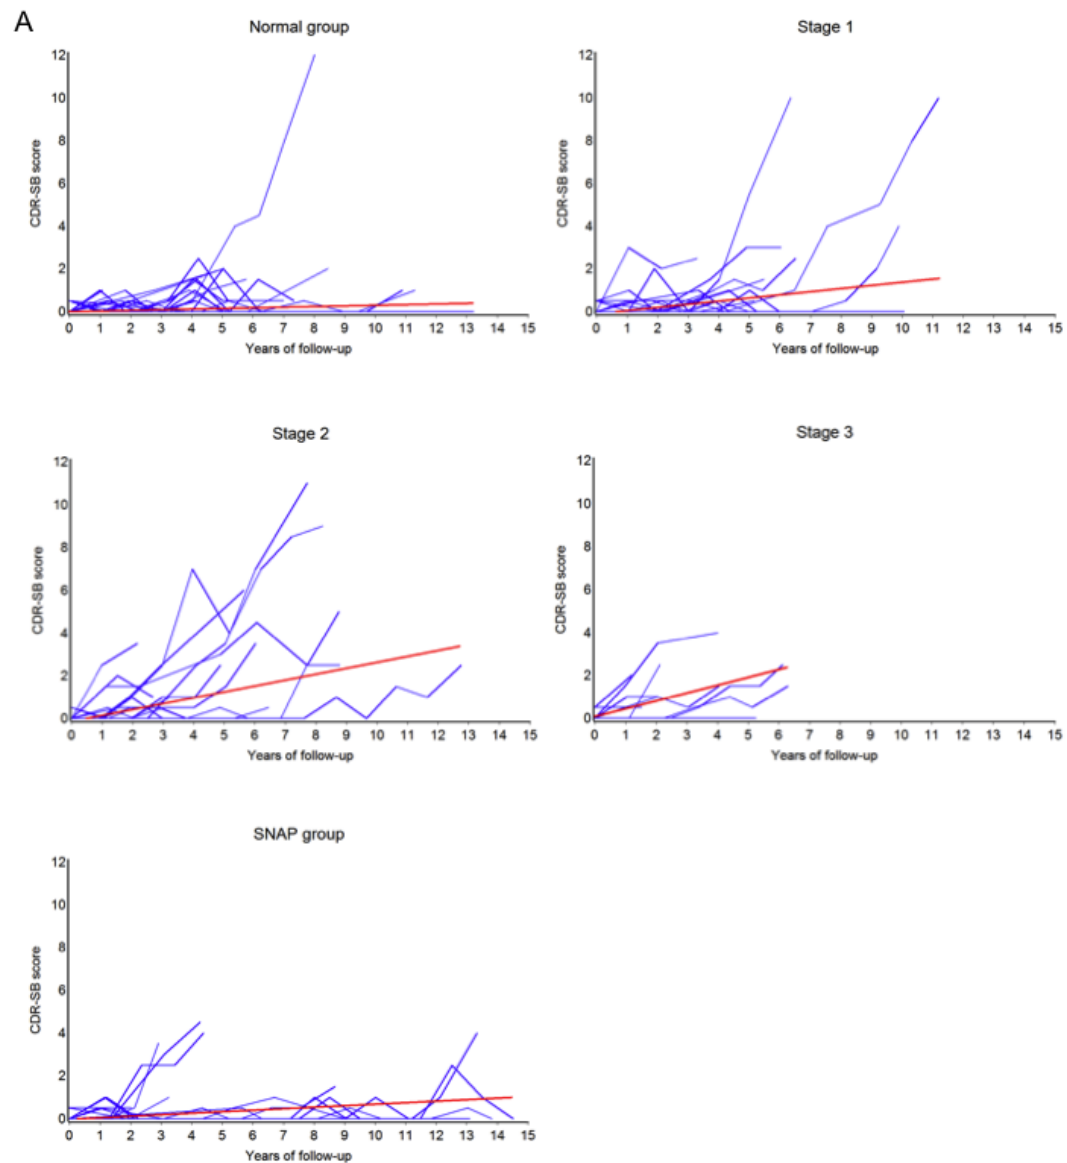

B

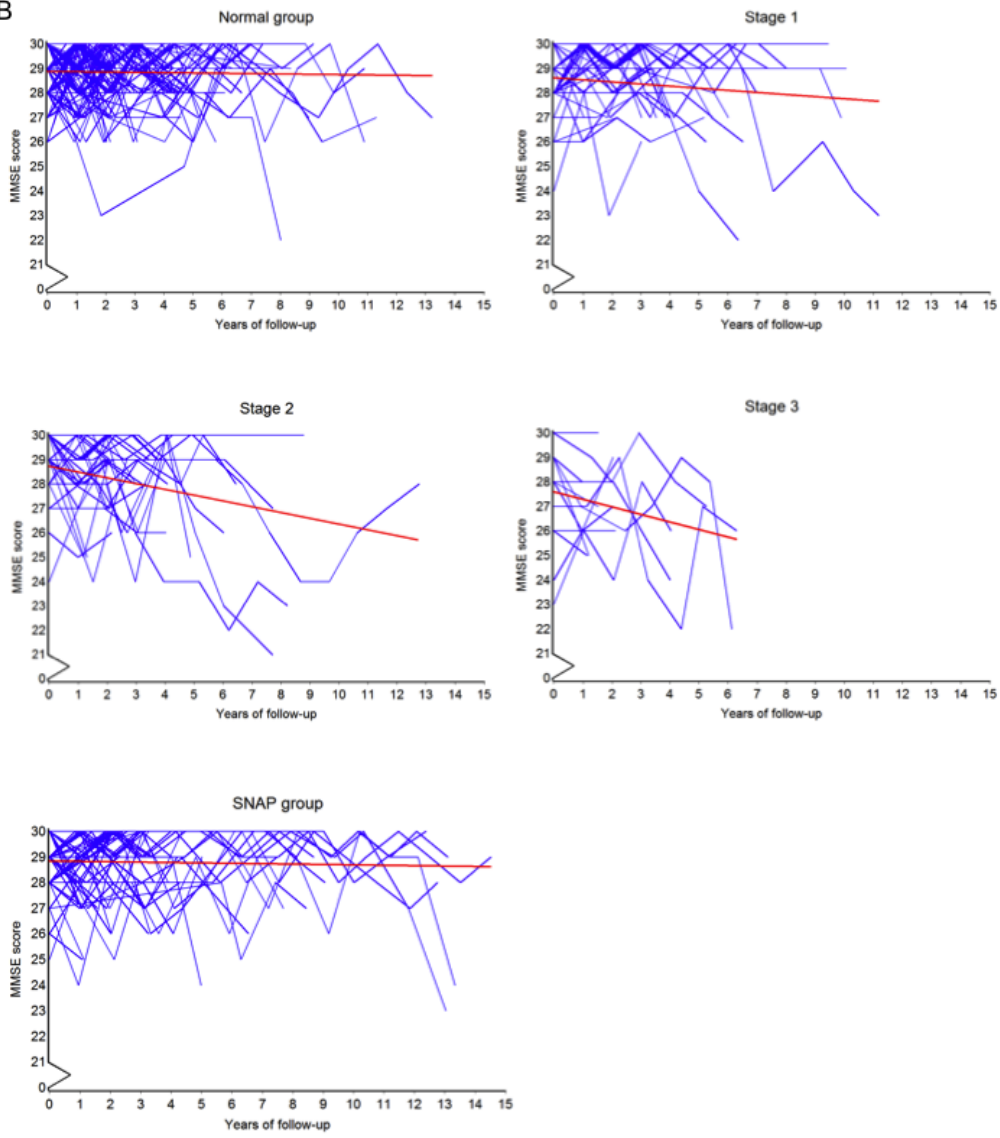

### Supplemental Text 1. Cohort information

The overall rate of progression from CDR 0 to CDR 0.5 or greater in our sample was 10% (32/311) over an average of 4 years of follow-up. This percent is comparable to the Mayo Clinic Study of Aging (MCSA), a population based longitudinal program in which many participants have multiple imaging procedures and some have lumbar puncture. The overall rate of progression from cognitive normality to MCI in the MCSA sample was 20% (296/1450) with a median follow-up of 3.4 years, but the MCI construct in the MCSA program was unstable as 34% of MCI individuals reverted to cognitive normality at subsequent follow-up.<sup>1</sup> Removing the MCSA individuals who later reverted to normal leaves 196 of the 1450 (13.5%) cognitively normal persons who developed MCI/symptomatic AD, very similar to our 10%.

#### References

1. Roberts RO, Geda YE, Knopman DS, et al. The incidence of MCI differs by subtype and is higher in men: the Mayo Clinic Study of Aging. *Neurology* 2012; **78**: 342–51.

**Supplemental Table 6. Preclinical AD and its outcome using different classification approaches**A) Use of different CSF cutoffs; A $\beta$ 1-42 <500, t-tau <440, p-tau181 <78 pg/ml

|                                                 | <b>Normal group</b> | <b>Stage 1</b> | <b>Stage 2</b> | <b>Stage 3</b> | <b>SNAP group</b> | <b>Unclassified group</b> |
|-------------------------------------------------|---------------------|----------------|----------------|----------------|-------------------|---------------------------|
| Proportion stages, n                            | 131 (42%)           | 85 (27%)       | 28 (9%)        | 13 (4%)        | 37 (12%)          | 17 (6%)                   |
| Progression to CDR $\geq$ 0.5 symptomatic AD, n | 2 (1.5%)            | 9 (11%)        | 7 (25%)        | 7 (54%)        | 2 (5%)            | 5 (29%)                   |
| Mortality, n                                    | 1 (1%)              | 7 (8%)         | 3 (11%)        | 4 (31%)        | 4 (11%)           | 1 (6%)                    |

B) Stage 3 defined as a score in the lowest 10<sup>th</sup> percentile of any cognitive domain

|                                                 | <b>Normal group</b> | <b>Stage 1</b> | <b>Stage 2</b> | <b>Stage 3</b> | <b>SNAP group</b> | <b>Unclassified group</b> |
|-------------------------------------------------|---------------------|----------------|----------------|----------------|-------------------|---------------------------|
| Proportion stages, n                            | 104 (33%)           | 37 (12%)       | 28 (9%)        | 21 (7%)        | 71 (23%)          | 50 (16%)                  |
| Progression to CDR $\geq$ 0.5 symptomatic AD, n | 2 (2%)              | 6 (16%)        | 8 (29%)        | 8 (38%)        | 4 (6%)            | 4 (8%)                    |
| Mortality, n                                    | 0 (0%)              | 5 (14%)        | 1 (4%)         | 6 (29%)        | 4 (6%)            | 4 (8%)                    |

C) Participants with a baseline CDR-SB of 0.5 excluded (n=293)

|                                                 | <b>Normal group</b> | <b>Stage 1</b> | <b>Stage 2</b> | <b>Stage 3</b> | <b>SNAP group</b> | <b>Unclassified group</b> |
|-------------------------------------------------|---------------------|----------------|----------------|----------------|-------------------|---------------------------|
| Proportion stages, n                            | 123 (42%)           | 43 (15%)       | 34 (12%)       | 11 (4%)        | 69 (24%)          | 13 (4%)                   |
| Progression to CDR $\geq$ 0.5 symptomatic AD, n | 2 (2%)              | 6 (14%)        | 9 (27%)        | 6 (55%)        | 4 (6%)            | 3 (23%)                   |
| Mortality, n                                    | 2 (2%)              | 5 (12%)        | 2 (6%)         | 4 (36%)        | 4 (6%)            | 0 (0%)                    |

Results are number (%) for (A) previously applied CSF cut-offs of our center, (B) a different definition of stage 3 based on the episodic memory, semantic memory, working memory, and visuospatial composite score (described in Johnson et al 2009), and (C) only participants with CDR-SB=0 at baseline. AD=Alzheimer's disease, CDR-SB=Clinical Dementia Rating scale Sum of Boxes (range 0-18, with 0 as the best score), CSF=cerebrospinal fluid, SNAP= Suspected Non-Alzheimer Pathophysiology.

**Supplemental Table 7. Prediction of the unclassified group for CDR $\geq$ 0.5 symptomatic AD, mortality, and annual cognitive decline**A) Prediction of the unclassified group for CDR $\geq$ 0.5 symptomatic AD and mortality

|                    | Progression to CDR $\geq$ 0.5 symptomatic AD |                          |                                     |                        |                                     | Mortality risk          |                                     |                       |                                     |
|--------------------|----------------------------------------------|--------------------------|-------------------------------------|------------------------|-------------------------------------|-------------------------|-------------------------------------|-----------------------|-------------------------------------|
|                    | 5-year progression rate                      | Uncorrected SHR (95% CI) | Difference compared to normal group | Corrected SHR (95% CI) | Difference compared to normal group | Uncorrected HR (95% CI) | Difference compared to normal group | Corrected HR (95% CI) | Difference compared to normal group |
| Normal group       | 2%                                           | Reference                |                                     | Reference              |                                     | Reference               |                                     | Reference             |                                     |
| Unclassified group | 34%                                          | 24.2 (4.7-125.5)         | P=0.0002                            | 16.4 (2.8-95.8)        | P=0.0019                            | 5.3 (0.5-59.9)          | P=0.1749                            | 2.8 (0.2-36.9)        | P=0.4305                            |

Results are 5-year progression rate (cumulative incidence rate) to CDR $\geq$ 0.5 symptomatic AD and associated subhazard ratio (SHR, 95% CI) for progression to CDR $\geq$ 0.5 symptomatic AD calculated using a Fine & Gray subdistribution hazards model, and hazard ratio (HR, 95% CI) for mortality calculated using Cox regression analyses. Analyses are shown as both uncorrected and corrected for baseline age, gender, education, and *APOE* genotype. AD=Alzheimer's disease, CDR=Clinical Dementia Rating scale, HR=Hazard Ratio, SHR=Subhazard Ratio, SNAP=Suspected Non-Alzheimer Pathophysiology.

## B) Annual rate of change in CDR-SB and MMSE for the unclassified group

| Stages             | Slope CDR-SB | P-value slope | Difference compared to normal group | Slope MMSE   | P-value slope | Difference compared to normal group |
|--------------------|--------------|---------------|-------------------------------------|--------------|---------------|-------------------------------------|
| Normal group       | 0.03 (0.03)  | P=0.2661      | Reference                           | -0.01 (0.03) | P=0.6673      | Reference                           |
| Unclassified group | 0.33 (0.08)  | P=0.0001      | P=0.0007                            | -0.24 (0.10) | P=0.0127      | P=0.0258                            |

Data are slopes (SE) corrected for age, gender, education, and *APOE* genotype and comparison to other groups. AD=Alzheimer's disease, CDR-SB=Clinical Dementia Rating scale Sum of Boxes (range 0-18, with 0 as the best score), MMSE=Mini-Mental State Examination (range 0-30, with 30 as the best score), SNAP=Suspected Non-Alzheimer Pathophysiology.
